# Supplementary material for: Identification of susceptibility pathways for the role of chromosome 15q25.1 in modifying lung cancer risk
Source: PubMed Central journal article supplement (PMC6089967; doi:10.1038/s41467-018-05074-y), 2018-08-13
Supplement: 41467_2018_5074_MOESM1_ESM.pdf [file 41467_2018_5074_MOESM1_ESM.pdf]

# **Identification of susceptibility pathways for the role of chromosome 15q25.1 in modifying lung cancer risk**

Ji et al.

**Supplementary table 1.** Participant characteristics for the eQTL study

| Variants       | All participants (n = 420) |       |
|----------------|----------------------------|-------|
|                | No.                        | %     |
| Age (years)    | 63.4± 10.0                 |       |
| Gender         |                            |       |
| Male           | 235                        | 55.95 |
| Female         | 185                        | 44.05 |
| Smoking Status |                            |       |
| Never          | 37                         | 8.81  |
| Ever           | 383                        | 91.19 |
| Histology      |                            |       |
| Squamous       | 240                        | 57.14 |
| Adenocarcinoma | 108                        | 25.72 |
| Other          | 72                         | 17.14 |

**Supplementary table 2.** Pathways and GO terms in sensitivity analysis for pathway enrichment with threshold of FDR < 0.25 in either phase of discovery and replication

| Source                      | Pathway/Gene set name                                 | Enrichment with actual P values of the candidate SNPs alone |        |                    |       | Enrichment with using the observed P values of the candidate SNPs and setting the P values of the index SNPs to 0.01 |       |                    |       |
|-----------------------------|-------------------------------------------------------|-------------------------------------------------------------|--------|--------------------|-------|----------------------------------------------------------------------------------------------------------------------|-------|--------------------|-------|
|                             |                                                       | Meta-analysis of Discovery Cohorts                          |        | Replication Cohort |       | Meta-analysis of Discovery                                                                                           |       | Replication Cohort |       |
|                             |                                                       | P-value                                                     | FDR    | P-value            | FDR   | P-value                                                                                                              | FDR   | P-value            | FDR   |
| KEGG                        | neuroactive ligand receptor interaction               |                                                             |        |                    |       | 0.004                                                                                                                | 0.024 |                    |       |
| Reactome                    | neuronal system                                       |                                                             |        |                    |       | 0.004                                                                                                                | 0.09  |                    |       |
|                             | transmission across chemical synapses                 |                                                             |        |                    |       | 0.018                                                                                                                | 0.086 |                    |       |
|                             | immune system                                         | 0.021                                                       | 0.1245 |                    |       | 0.044                                                                                                                | 0.139 |                    |       |
|                             | transmembrane transport of small molecules            | 0.016                                                       | 0.214  |                    |       | 0.017                                                                                                                | 0.111 |                    |       |
|                             | gpcr downstream signaling                             |                                                             |        |                    |       |                                                                                                                      |       | 0.039              | 0.217 |
| Gene                        |                                                       |                                                             |        |                    |       |                                                                                                                      |       |                    |       |
| Oncology                    | substrate specific channel activity                   |                                                             |        |                    |       | 0.002                                                                                                                | 0.025 | 0.004              | 0.017 |
|                             | ion channel activity                                  |                                                             |        |                    |       | 0.002                                                                                                                | 0.025 | 0.004              | 0.017 |
|                             | gated channel activity                                |                                                             |        |                    |       | 0.016                                                                                                                | 0.024 | 0.003              | 0.052 |
|                             | cation channel activity                               |                                                             |        |                    |       | 0.009                                                                                                                | 0.022 | 0.003              | 0.032 |
|                             | ion transmembrane transporter activity                |                                                             |        |                    |       | 0.005                                                                                                                | 0.019 | 0.024              | 0.057 |
|                             | metal ion transmembrane transporter activity          |                                                             |        |                    |       | 0.003                                                                                                                | 0.019 | 0.007              | 0.023 |
|                             | transmembrane transporter activity                    |                                                             |        |                    |       | 0.002                                                                                                                | 0.012 | 0.04               | 0.071 |
|                             | substrate specific transmembrane transporter activity |                                                             |        |                    |       | 0.002                                                                                                                | 0.015 | 0.036              | 0.073 |
|                             | cation transmembrane transporter activity             |                                                             |        |                    |       | 0.004                                                                                                                | 0.013 | 0.014              | 0.041 |
|                             | transmembrane receptor activity                       |                                                             |        | 0.022              | 0.24  | 0.01                                                                                                                 | 0.022 | 0.002              | 0.021 |
|                             | receptor activity                                     |                                                             |        |                    |       | 0.042                                                                                                                | 0.075 | 0.01               | 0.038 |
|                             | protein complex                                       |                                                             |        |                    |       | 0.003                                                                                                                | 0.058 | 0.046              | 0.191 |
|                             | intrinsic to membrane                                 | 0.045                                                       | 0.184  |                    |       | 0.018                                                                                                                | 0.087 | 0.039              | 0.227 |
|                             | membrane part                                         |                                                             |        |                    |       | 0.019                                                                                                                | 0.064 | 0.042              | 0.196 |
|                             | substrate specific transporter activity               |                                                             |        |                    |       | 0.004                                                                                                                | 0.012 |                    |       |
|                             | macromolecular complex                                |                                                             |        |                    |       | 0.003                                                                                                                | 0.039 |                    |       |
|                             | intrinsic to plasma membrane                          |                                                             |        |                    |       | 0.014                                                                                                                | 0.073 |                    |       |
|                             | integral to membrane                                  | 0.037                                                       | 0.1904 |                    |       | 0.013                                                                                                                | 0.098 |                    |       |
|                             | membrane                                              |                                                             |        |                    |       | 0.02                                                                                                                 | 0.081 |                    |       |
|                             | plasma membrane part                                  |                                                             |        |                    |       | 0.024                                                                                                                | 0.083 |                    |       |
| integral to plasma membrane |                                                       |                                                             |        |                    | 0.009 | 0.07                                                                                                                 |       |                    |       |

|           |                                                       |       |       |       |      |       |       |       |       |
|-----------|-------------------------------------------------------|-------|-------|-------|------|-------|-------|-------|-------|
|           | intracellular organelle part                          | 0.042 | 0.227 |       |      | 0.038 | 0.082 |       |       |
|           | organelle part                                        | 0.042 | 0.227 |       |      | 0.038 | 0.082 |       |       |
|           | phosphotransferase activity alcohol group as acceptor |       |       | 0.036 | 0.19 |       |       | 0.049 | 0.072 |
|           | protein kinase activity                               |       |       |       |      |       |       | 0.033 | 0.068 |
| canonical | mark signaling pathway                                |       |       | 0.042 | 0.08 |       |       | 0.03  | 0.07  |

---

**Supplementary table 3.** Pathways and GO terms in discovery and replication with threshold of P value < 0.05 in both phase using GSA-SNP2

|                        |                                                                                        | Meta-analysis of |             |
|------------------------|----------------------------------------------------------------------------------------|------------------|-------------|
|                        |                                                                                        | Discovery        | Replication |
|                        |                                                                                        | Cohorts          | Cohort      |
| Pathway/Gene set name  |                                                                                        | p-value          | p-value     |
| KEGG                   | neuroactive ligand receptor interaction                                                | 4.71E-06         | 5.11E-08    |
| Reactome               | neurotransmitter receptor binding and downstream transmission in the postsynaptic cell | 1.51E-05         | 4.39E-11    |
|                        | transmission across chemical synapses                                                  | 3.45E-04         | 8.87E-09    |
|                        | adaptive immune system                                                                 | 3.92E-02         | 4.08E-03    |
| Gene Oncology          | l1cam interactions                                                                     | 4.82E-02         | 1.59E-02    |
|                        | substrate specific transporter activity                                                | 1.36E-06         | 1.11E-04    |
|                        | transmembrane transporter activity                                                     | 3.12E-06         | 6.17E-05    |
|                        | cation transmembrane transporter activity                                              | 3.13E-06         | 4.22E-07    |
|                        | substrate specific transmembrane transporter activity                                  | 5.77E-06         | 1.15E-05    |
|                        | ion transmembrane transporter activity                                                 | 1.21E-05         | 3.16E-06    |
|                        | cation channel activity                                                                | 2.23E-05         | 4.94E-10    |
|                        | metal ion transmembrane transporter activity                                           | 4.15E-05         | 8.36E-09    |
|                        | ion channel activity                                                                   | 7.26E-05         | 6.28E-10    |
|                        | substrate specific channel activity                                                    | 7.26E-05         | 6.28E-10    |
|                        | gated channel activity                                                                 | 1.46E-04         | 1.13E-10    |
|                        | transmembrane receptor activity                                                        | 2.78E-03         | 1.31E-07    |
|                        | receptor activity                                                                      | 1.11E-02         | 1.50E-06    |
|                        | voltage gated cation channel activity                                                  | 2.74E-02         | 9.57E-04    |
|                        | voltage gated channel activity                                                         | 2.74E-02         | 9.57E-04    |
|                        | receptor complex                                                                       | 6.35E-04         | 5.32E-11    |
|                        | integral to membrane                                                                   | 1.22E-03         | 1.85E-03    |
|                        | integral to plasma membrane                                                            | 1.45E-03         | 7.55E-04    |
|                        | intrinsic to membrane                                                                  | 1.57E-03         | 1.88E-03    |
|                        | intrinsic to plasma membrane                                                           | 1.95E-03         | 7.90E-04    |
| membrane part          | 2.17E-03                                                                               | 6.56E-03         |             |
| plasma membrane part   | 3.35E-03                                                                               | 5.74E-04         |             |
| protein complex        | 9.28E-03                                                                               | 2.13E-04         |             |
| macromolecular complex | 1.90E-02                                                                               | 1.36E-03         |             |
| plasma membrane        | 2.36E-02                                                                               | 3.65E-03         |             |
| membrane               | 2.51E-02                                                                               | 1.54E-02         |             |

**Supplementary table 4.** Functional annotation of eQTL study results for our susceptibility GWAS GO terms

| Category   | GO Term                                               | Analysis with genes in chromosome | Analysis with the related |
|------------|-------------------------------------------------------|-----------------------------------|---------------------------|
|            |                                                       | 15q25.1 and its related genes     | genes alone               |
|            |                                                       | <i>P</i> -value                   | <i>P</i> -value           |
| GO:0022836 | gated channel activity                                | 0.029                             | 0.088                     |
| GO:0005216 | ion channel activity                                  | 0.071                             | 0.17                      |
| GO:0005261 | cation channel activity                               | 0.073                             | 0.2                       |
| GO:0022838 | substrate-specific channel activity                   | 0.08                              | 0.186                     |
| GO:0008324 | cation transmembrane transporter activity             | 0.098                             | 0.199                     |
| GO:0015075 | ion transmembrane transporter activity                | 0.128                             | 0.229                     |
| GO:0022891 | substrate-specific transmembrane transporter activity | 0.221                             | 0.348                     |
| GO:0022857 | transmembrane transporter activity                    | 0.282                             | 0.42                      |
| GO:0005886 | plasma membrane                                       | 0.354                             | 0.391                     |
| GO:0022892 | substrate-specific transporter activity               | 0.37                              | 0.514                     |
| GO:0046873 | metal ion transmembrane transporter activity          | 0.371                             | 0.358                     |
| GO:0005887 | integral to plasma membrane                           | 0.59                              | 0.708                     |
| GO:0031226 | intrinsic to plasma membrane                          | 0.636                             | 0.747                     |
| GO:0004888 | transmembrane signaling receptor activity             | 0.676                             | 0.798                     |
| GO:0044459 | plasma membrane part                                  | 0.695                             | 0.77                      |
| GO:0004872 | receptor activity                                     | 0.775                             | 0.862                     |
| GO:0031224 | intrinsic to membrane                                 | 0.852                             | 0.872                     |
| GO:0016020 | membrane                                              | 0.865                             | 0.866                     |
| GO:0016021 | integral to membrane                                  | 0.876                             | 0.895                     |
| GO:0044425 | membrane part                                         | 0.961                             | 0.967                     |

**Supplementary table 5.** Index SNPs in the chromosome 15q25.1 locus which were associated with lung cancer among smokers

| SNP        | Gene   | Predicted function | Position | A1 | A2 | 1 <sup>st</sup> discovery cohort |        |          | 2 <sup>nd</sup> discovery cohort |      |          | Meta-analysis of Discovery Cohorts |      |          | Replication Cohort |      |          |
|------------|--------|--------------------|----------|----|----|----------------------------------|--------|----------|----------------------------------|------|----------|------------------------------------|------|----------|--------------------|------|----------|
|            |        |                    |          |    |    | <i>P</i> -value                  | OR     | BONF*    | <i>P</i> -value                  | OR   | BONF*    | <i>P</i> -value                    | OR   | BONF*    | <i>P</i> -value    | OR   | BONF*    |
|            |        |                    |          |    |    | rs1051730                        | CHRNA3 | coding   | 76681394                         | T    | C        | 3.10E-14                           | 1.49 | 1.06E-10 | 1.19E-11           | 1.31 | 4.04E-08 |
| rs8034191  | HYKK   | intronic           | 76593078 | C  | T  | 2.29E-11                         | 1.42   | 7.79E-08 | 1.60E-11                         | 1.30 | 5.46E-08 | 5.32E-21                           | 1.34 | 1.65E-15 | 3.99E-51           | 1.33 | 1.36E-47 |
| rs1996371  | CHRNA4 | intronic           | 76743861 | G  | A  | 3.34E-11                         | 1.41   | 1.14E-07 | 2.96E-04                         | 1.15 | 1.00E+00 | 6.77E-12                           | 1.24 | 2.10E-06 | 3.12E-24           | 1.21 | 1.06E-20 |
| rs6495314  | CHRNA4 | intronic           | 76747584 | C  | A  | 7.40E-11                         | 1.40   | 2.52E-07 | 1.73E-04                         | 1.16 | 1.00E+00 | 5.05E-12                           | 1.24 | 1.57E-06 | 1.69E-23           | 1.21 | 5.76E-20 |
| rs11638372 | CHRNA4 | intronic           | 76770614 | T  | C  | 8.48E-10                         | 1.37   | 2.89E-06 | 4.10E-04                         | 1.15 | 1.00E+00 | 8.37E-11                           | 1.22 | 2.60E-05 | 3.28E-23           | 1.20 | 1.12E-19 |
| rs4887077  | CHRNA4 | intronic           | 76765419 | T  | C  | 1.15E-09                         | 1.37   | 3.92E-06 | 3.97E-04                         | 1.15 | 5.90E-01 | 9.96E-11                           | 1.22 | 3.09E-05 | 2.93E-23           | 1.20 | 9.99E-20 |
| rs2036534  | HYKK   | 3downstream        | 76614003 | C  | T  | 2.02E-09                         | 0.69   | 6.90E-06 | 1.22E-04                         | 0.83 | 4.15E-01 | 2.46E-11                           | 0.78 | 7.63E-06 | 1.69E-33           | 0.76 | 5.76E-30 |
| rs6495309  | CHRNA4 | 3downstream        | 76702300 | T  | C  | 3.74E-08                         | 0.71   | 1.27E-04 | 3.66E-05                         | 0.82 | 1.25E-01 | 3.55E-11                           | 0.78 | 1.10E-05 | 5.72E-29           | 0.78 | 1.95E-25 |

\**P*-value was adjusted for multiple comparisons using Bonferroni correction.

**Supplementary Table 6.** Pathways and GO terms for smoking-related lung cancer in the discovery and replication cohorts with threshold of FDR < 0.25

| Source        | Pathway/Gene set name                        | Meta-analysis of Discovery Cohorts |       | Replication Cohort |       |
|---------------|----------------------------------------------|------------------------------------|-------|--------------------|-------|
|               |                                              | P-value                            | FDR   | P-value            | FDR   |
| Kegg          | neuroactive ligand receptor interaction      | 0.004                              | 0.017 | < 0.001            | 0.003 |
| Gene Oncology | receptor activity                            | 0.009                              | 0.078 | < 0.001            | 0.019 |
|               | substrate-specific channel activity          | 0.009                              | 0.098 | 0.002              | 0.012 |
|               | metal ion transmembrane transporter activity | 0.022                              | 0.103 | 0.002              | 0.018 |
|               | cation transmembrane transporter activity    | 0.033                              | 0.119 | 0.005              | 0.011 |
|               | ion channel activity                         | 0.008                              | 0.122 | 0.002              | 0.01  |
|               | transmembrane transporter activity           | 0.035                              | 0.133 | 0.006              | 0.022 |
|               | transmembrane receptor activity              | 0.001                              | 0.144 | 0.002              | 0.015 |
|               | cation channel activity                      | 0.006                              | 0.146 | 0.002              | 0.011 |
