# Supplementary material for: Identification of susceptibility pathways for the role of chromosome 15q25.1 in modifying lung cancer risk
Source: Springer Nature journal article supplement (doi:10.1038/s41467-018-05074-y), 2018-08-07
Supplement: MOESM2 [file 41467_2018_5074_MOESM2_ESM.pdf › 41467_2018_5074_MOESM2_ESM.pdf]

## **Description of Additional Supplementary Files**

File Name: Supplementary Data 1

Description: 5,883 SNP pairs which show significant interaction between the index SNPs in chromosome 15q25.1 and their interacting candidate SNPs in the discovery cohorts

File Name: Supplementary Data 2

Description: Summary of the index SNPs within chromosome 15q25.1 and the 3,409 candidate SNPs within whole genome

File Name: Supplementary Data 3

Description: The LD of the left 2530 SNPs after pruned from 8 index and 3409 candidate SNPs

File Name: Supplementary Data 4

Description: The eQTL results of the selected SNPs and genes in whole genome with threshold of P value  $< 0.0005$ .

File Name: Supplementary Data 5

Description: The selected genes and their reference SNPs of our susceptibility pathways and GO terms in GWAS enrichment analysis.

File Name: Supplementary Data 6

Description: The summary of the index SNPs within chromosome 15q25.1 and the 3,401 candidate SNPs within whole genome for smoking-related lung cancer

File Name: Supplementary Data 7

Description: The LD of the left index and candidate SNPs after pruned for smoking-related lung cancer.
